## Spontaneous coronary artery dissection and takotsubo syndrome: comparison of baseline clinical and angiographic characteristics and in-hospital outcomes

J. Salamanca Viloria<sup>1</sup>, M. Garcia-Guimaraes<sup>1</sup>, P. Diez-Villanueva<sup>1</sup>, F. Macaya<sup>2</sup>, R. Sanz<sup>3</sup>, G. Roura<sup>4</sup>, J.C. Barahona-Alvarado<sup>5</sup>, H. Tizon<sup>6</sup>, X. Flores-Rios<sup>7</sup>, C. Lezcano-Pertejo<sup>8</sup>, J.J. Portero-Portaz<sup>9</sup>, T. Alvarado Casas<sup>1</sup>, R. Aguilar Torres<sup>1</sup>, T. Bastante Valiente<sup>1</sup>, F. Alfonso Manterola<sup>1</sup>

<sup>1</sup>University Hospital La Princesa, Madrid, Spain; <sup>2</sup>Hospital Clinico San Carlos, Madrid, Spain; <sup>3</sup>University Hospital Gregorio Maranon, Madrid, Spain; <sup>4</sup>University Hospital of Bellvitge, Hospitalet De Llobregat, Spain; <sup>5</sup>Germans Trias i Pujol Hospital, Badalona, Spain; <sup>6</sup>Hospital del Mar, Barcelona, Spain; <sup>7</sup>University Hospital A Coruna, A Coruna, Spain; <sup>8</sup>Hospital of Leon (Complejo Asistencial Universitario de Leon), Leon, Spain; <sup>9</sup>Albacete University Hospital, Albacete, Spain

**Funding Acknowledgement:** Type of funding source: None

**Background:** Spontaneous coronary artery dissection (SCAD) and Takotsubo syndrome (TTS) constitute two relatively common non-atherosclerotic causes of acute cardiac syndrome particularly frequent in women.

**Methods:** Herein we compared the baseline clinical and angiographic characteristics and in-hospital outcomes of 2 large prospective registries on SCAD and TTS.

**Results:** A total of 318 SCAD and 106 TTS patients were included (88% women). Patients in the TTS group were older (Table) and presented a higher prevalence of cardiovascular risk factors. Precipitating triggers were more frequent in TTS patients (42% vs. 56%,  $P=0.009$ ) but emotional stress was more common in the SCAD group (25% vs. 15%,  $P=0.037$ ). SCAD patients had higher troponin and creatine-kinase levels. The left an-

terior descending coronary artery was the most frequently involved vessel (44%). Left ventricular dysfunction (ejection fraction  $57\pm 10$  vs.  $40\pm 10\%$ ,  $P<0.001$ ) was more frequently in TTS patients. Major adverse cardiovascular events (including death, myocardial infarction, ischemia-driven revascularization, development of heart failure and stroke during hospitalization) (4.7% vs. 12.3%,  $P<0.001$ ) occurred more frequently in TTS patients, that also developed more frequently heart failure ( $<1\%$  vs. 10%,  $P<0.001$ ) and atrial fibrillation (1% vs. 11%,  $P<0.001$ ). No differences were found in the rate of stroke in the 2 groups.

**Conclusions:** TTS patients are older and present a higher prevalence of cardiovascular risk factors than SCAD patients. They also present a worse in-hospital prognosis with higher mortality.

Inhospital adverse events

| Mean± SD, median (IQR), or n (%) | SCAD (n=318) | TTS (n=106) | P      |
|----------------------------------|--------------|-------------|--------|
| Age (years)                      | 53 (47–60)   | 74 (67–81)  | <0.001 |
| Death (all cause)                | 4 (1)        | 6 (6)       | 0.032  |
| Heart failure                    | 2 (1)        | 11 (10)     | <0.001 |
| Stroke                           | 2 (1)        | 0 (0)       | 0.586  |
| Atrial fibrillation              | 3 (1)        | 12 (11)     | <0.001 |
| Reinfarction                     | 10 (3)       | n/a         |        |
| Unplanned revascularization      | 12 (4)       | n/a         |        |
| TVR                              | 4 (1)        | n/a         |        |
| Non TVR                          | 1 (<1)       | n/a         |        |

SCAD: Spontaneous coronary artery dissection; TTS: Takotsubo syndrome; TVR: Target vessel revascularization. n/a: not applicable.
